# Supplementary material for: Ag–Au bimetallic nanocomposites stabilized with organic–inorganic hybrid microgels: synthesis and their regulated optical and catalytic properties
Source: PubMed Central journal article supplement — RSC Adv. 2018 Apr 3;8(22):12428–38. doi: 10.1039/c8ra01343h (PMC9079633; doi:10.1039/c8ra01343h), 2018-04-03
Supplement: RA-008-C8RA01343H-s001.pdf [file RA-008-C8RA01343H-s001.pdf]

## Electronic Supplementary Material (ESI)

Ag-Au bimetallic nanocomposites stabilized with organic-inorganic composite polymer: synthesis and their regulated optical and catalytic properties

Lei Li, Rui Niu, Ying Zhang\*

Key Laboratory of Applied Surface and Colloid Chemistry, Ministry of Education;  
School of Chemistry and Chemical Engineering, Shaanxi Normal University, Xi'an  
710062, China

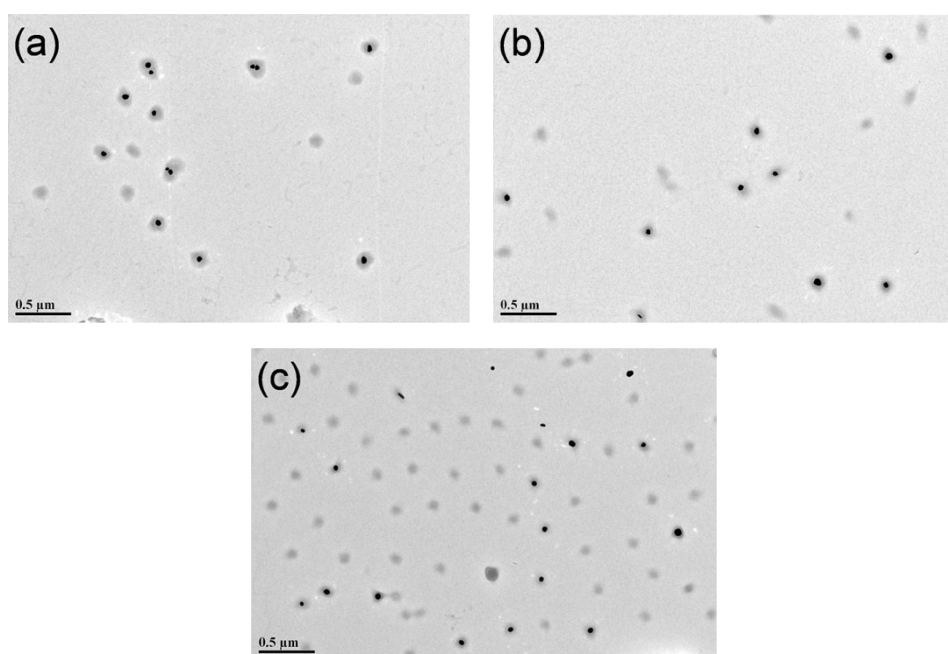

**Fig. S1** TEM images of Ag@P(NIPAM-co-MAPTMS) hybrid microgels prepared with the different mass of NIPAM.

(a) 0.02 g, (b) 0.06 g, (c) 0.08 g

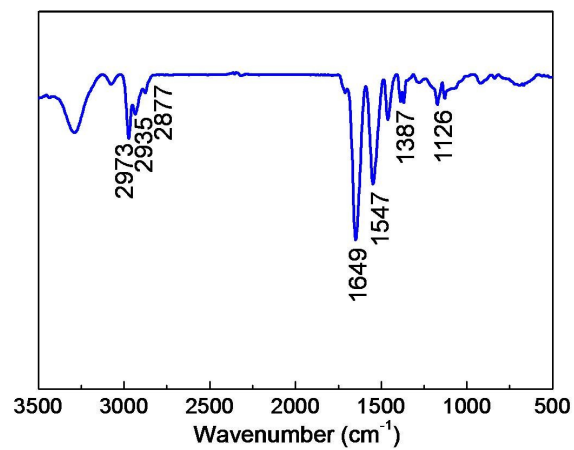

**Fig. S2** FT-IR spectrum of Ag@P(NIPAM-co-MAPTMS) hybrid microgels.

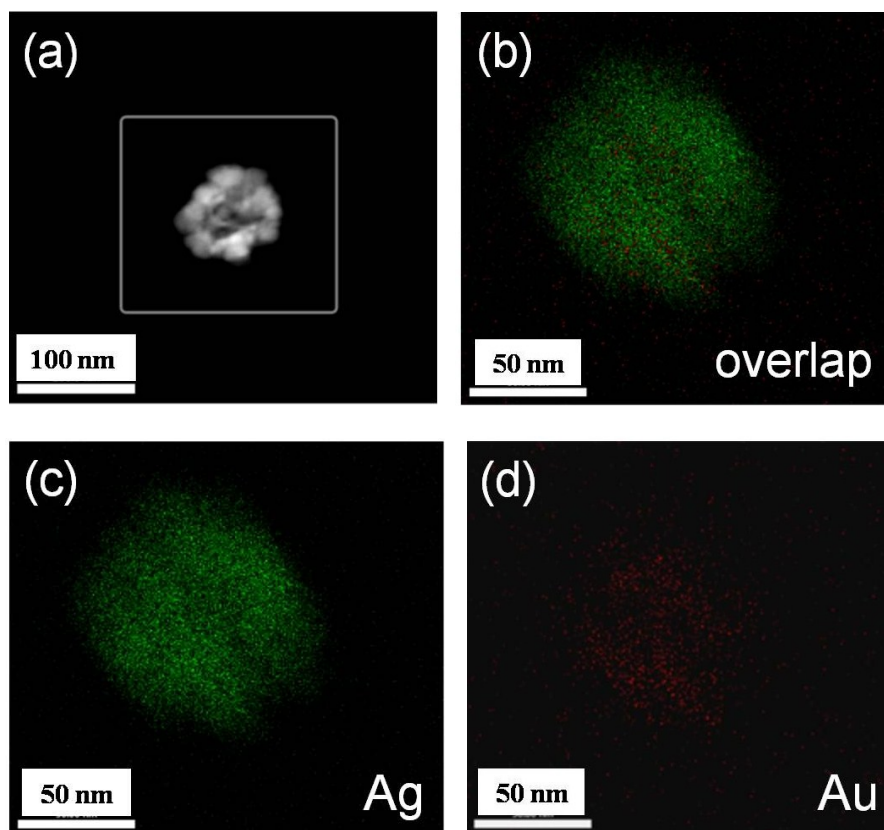

**Fig. S3** STEM images for Ag-Au@P(NIPAM-co-MAPTMS)-2 hybrid microgels (a) and EDX mapping of Au and Ag elements (b-d).

**Table S1** The electronic binding energies of Ag and Au for Ag-Au@P(NIPAM-*co*-MAPTMS) hybrid microgels from XPS results.

| Samples                          | $V(\text{HAuCl}_4)$ | Binding energy (eV)  |                      |                      |                      |
|----------------------------------|---------------------|----------------------|----------------------|----------------------|----------------------|
|                                  |                     | Ag 3d <sub>5/2</sub> | Ag 3d <sub>3/2</sub> | Au 4f <sub>7/2</sub> | Au 4f <sub>5/2</sub> |
| Ag@P(NIPAM- <i>co</i> -MAPTMS)-2 | 3.0 mL              | 368.0                | 374.0                | 84.0                 | 87.7                 |
| Ag@P(NIPAM- <i>co</i> -MAPTMS)-3 | 6.0 mL              | 367.7                | 373.7                | 83.7                 | 87.4                 |
| Ag@P(NIPAM- <i>co</i> -MAPTMS)-4 | 9.0 mL              | 367.5                | 373.5                | 83.5                 | 87.2                 |

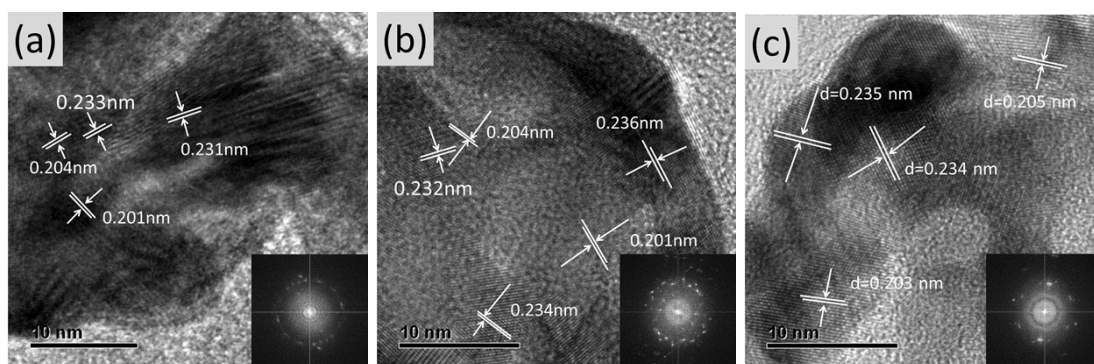

**Fig. S4** HR-TEM and the FFT images (inset) of the Ag-Au@P(NIPAM-*co*-MAPTMS) bimetallic hybrid microgels at different volume of HAuCl<sub>4</sub>.

(a) 3.0 mL, (b) 6.0 mL, (c) 9.0 mL

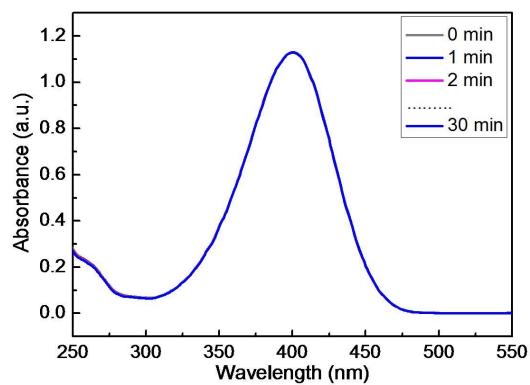

**Fig. S5** UV-Vis absorption spectra for 4-NP in the absence of catalyst.

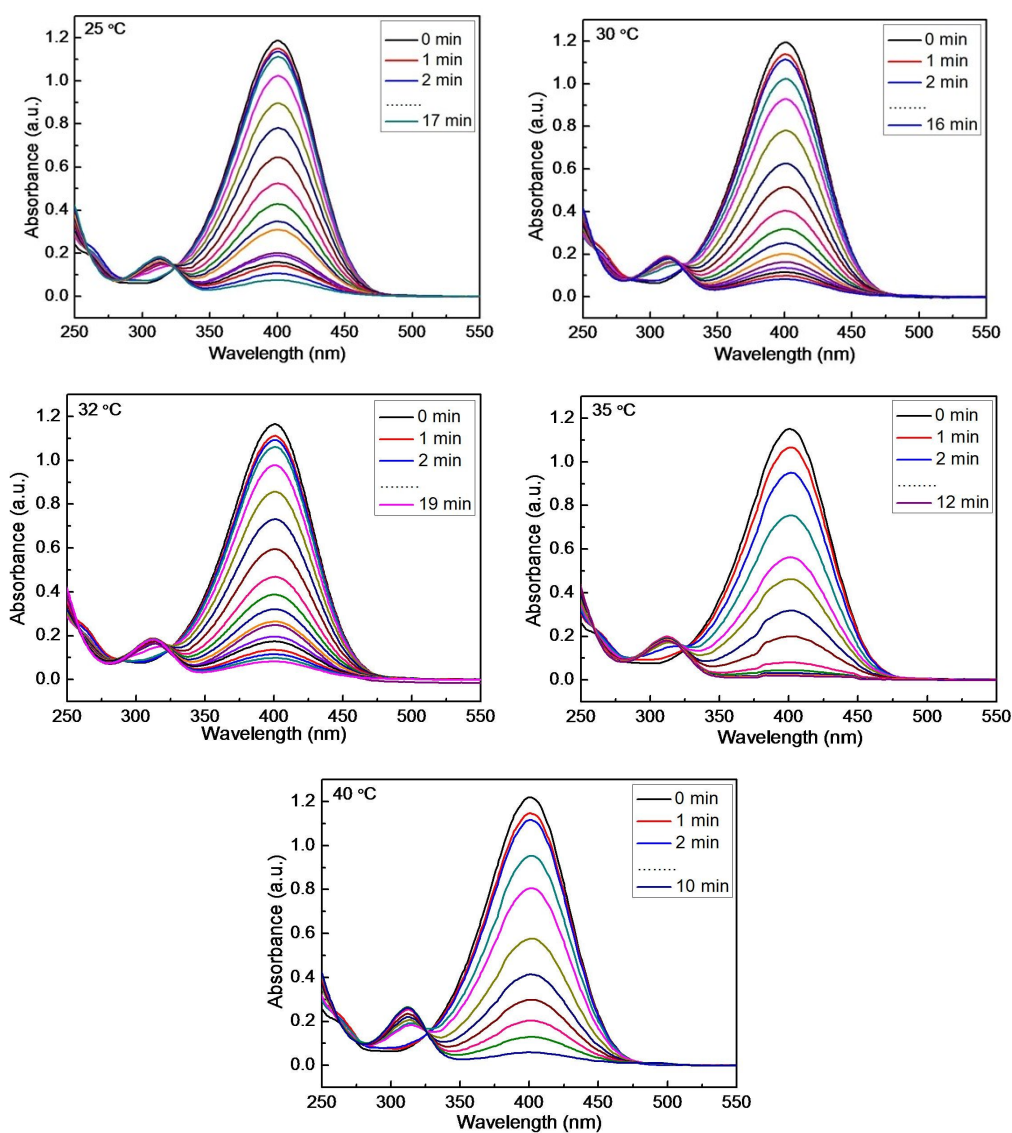

**Fig. S6** UV-Vis absorption spectra for the reduction of 4-NP in the presence of Ag-Au@P(NIPAM-co-MAPTMS)-3 hybrid microgels under different temperature.

**Table S2** The activation parameters for the reduction of 4-NP by Ag-Au@P(NIPAM-co-MAPTMS) before and after LCST.

| Temperature            | $A(\text{min}^{-1})$ | $E_a(\text{J/mol})$ | $\Delta H(\text{J/mol})$ | $\Delta S(\text{J/mol}\cdot\text{K})$ |
|------------------------|----------------------|---------------------|--------------------------|---------------------------------------|
| Before LCST (25-30 °C) | 27.23                | $1.25 \times 10^4$  | $0.97 \times 10^4$       | -260.89                               |
| After LCST (35-40 °C)  | 321.93               | $1.80 \times 10^4$  | $1.39 \times 10^4$       | -244.60                               |

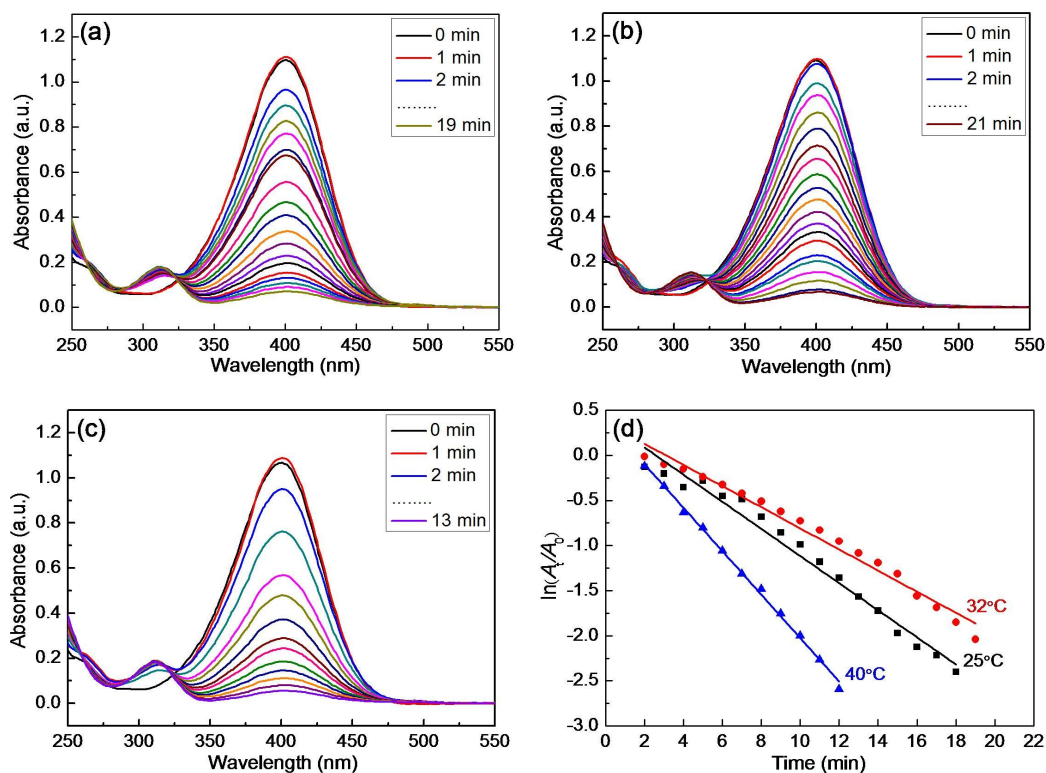

**Fig. S7** UV-Vis absorption spectra and plots of the  $\ln(A_t/A_0)$  versus time (d) for the reduction of 4-NP in the presence of Ag-Au@PNIPAM hybrid microgels under different temperature.

(a) 25 °C, (b) 32 °C, (c) 40 °C

**Table S3** Comparison of apparent rate constant and intrinsic rate constant of different catalytic systems for the reduction of 4-NP.

| Catalysts                  | Amount of catalyst ( $\mu\text{g/mL}$ ) | Size of NPs (nm) | Apparent rate constant ( $\text{min}^{-1}$ ) | Intrinsic rate constant ( $\text{L}/(\text{min}\cdot\text{g})$ ) | Refs.     |
|----------------------------|-----------------------------------------|------------------|----------------------------------------------|------------------------------------------------------------------|-----------|
| Ag-P(NIPAM-co-AAm)         | 37180                                   | 15               | 0.2646 (32 °C)                               | 0.0071                                                           | 1         |
| Ag-P(NIPAM-AAc-AAm)        | 66                                      | 20               | 0.883 (22 °C)                                | 13.38                                                            | 2         |
| Ag-P(NIPAAm-HEMA-AAc)      | 56                                      | 10 $\pm$ 3       | 0.916 (22 °C)                                | 16.35                                                            | 3         |
| P(AAc)-Co                  | 1000                                    | -                | 0.0472 (30 °C)                               | 0.0472                                                           | 4         |
| Ag@P(GSH)                  | 219                                     | 6                | 1.02 (22 °C)                                 | 4.66                                                             | 5         |
| Ag@P(NIPAM-co-MAPTMS)      | 7.5                                     | 35 $\pm$ 5       | 0.062 (25 °C)                                | 8.27                                                             | This work |
| Ag-Au@P(NIPAM-co-MAPTMS)-3 | 7.5                                     | 35 $\pm$ 5       | 0.174 (25 °C)<br>0.162 (32 °C)               | 23.2<br>21.6                                                     | This work |

## References

- 1 R. Begum, Z. H. Farooqi, E. Ahmed, K. Naseem, S. Ashraf, A. Sharif and R. Rehan, *Appl. Organometal. Chem.*, 2017, **31**, e3563.
- 2 R. Begum, K. Naseem, E. Ahmed, A. Sharif and Z. H. Farooqi, *Colloids and Surfaces A: Physicochem. Eng. Aspects*, 2016, **511**, 17-26.
- 3 R. Begum, Z. H. Farooqi, Z. Butt, Q. S. Wu, W. T. Wu and A. Irfan, *Journal of environmental sciences*, 2017, Doi: org/10.1016/j.jes.2017.12.003.
- 4 F. Bibi, M. Ajmal, F. Naseer, Z. H. Farooqi and M. Siddiq, *Int. J. Environ. Sci. Technol*, 2017, Doi: 10.1007/s13762-017-1446-4.
- 5 C. Kastner and A. F. Thünemann, *Langmuir*, 2016, **32**, 7383-7391.

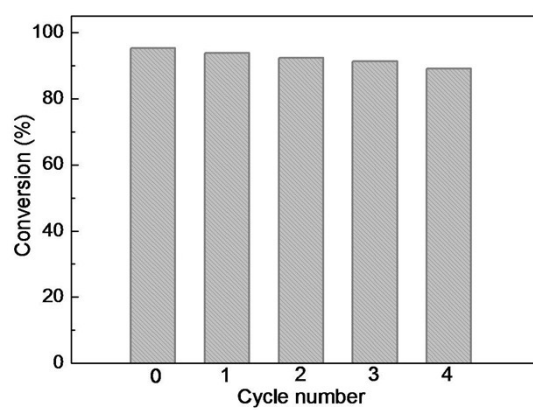

**Fig. S8** Conversion of 4-NP in five successive cycles with Ag-Au@P(NIPAM-co-MAPTMS)-3 hybrid microgels.
